# Supplementary material for: IFNγ is a central node of cancer immune equilibrium
Source: PubMed Central journal article supplement (PMC10214249; doi:10.1016/j.celrep.2023.112219), 2023-03-06
Supplement: NIHMS1887288-supplement-2.pdf [file NIHMS1887288-supplement-2.pdf]

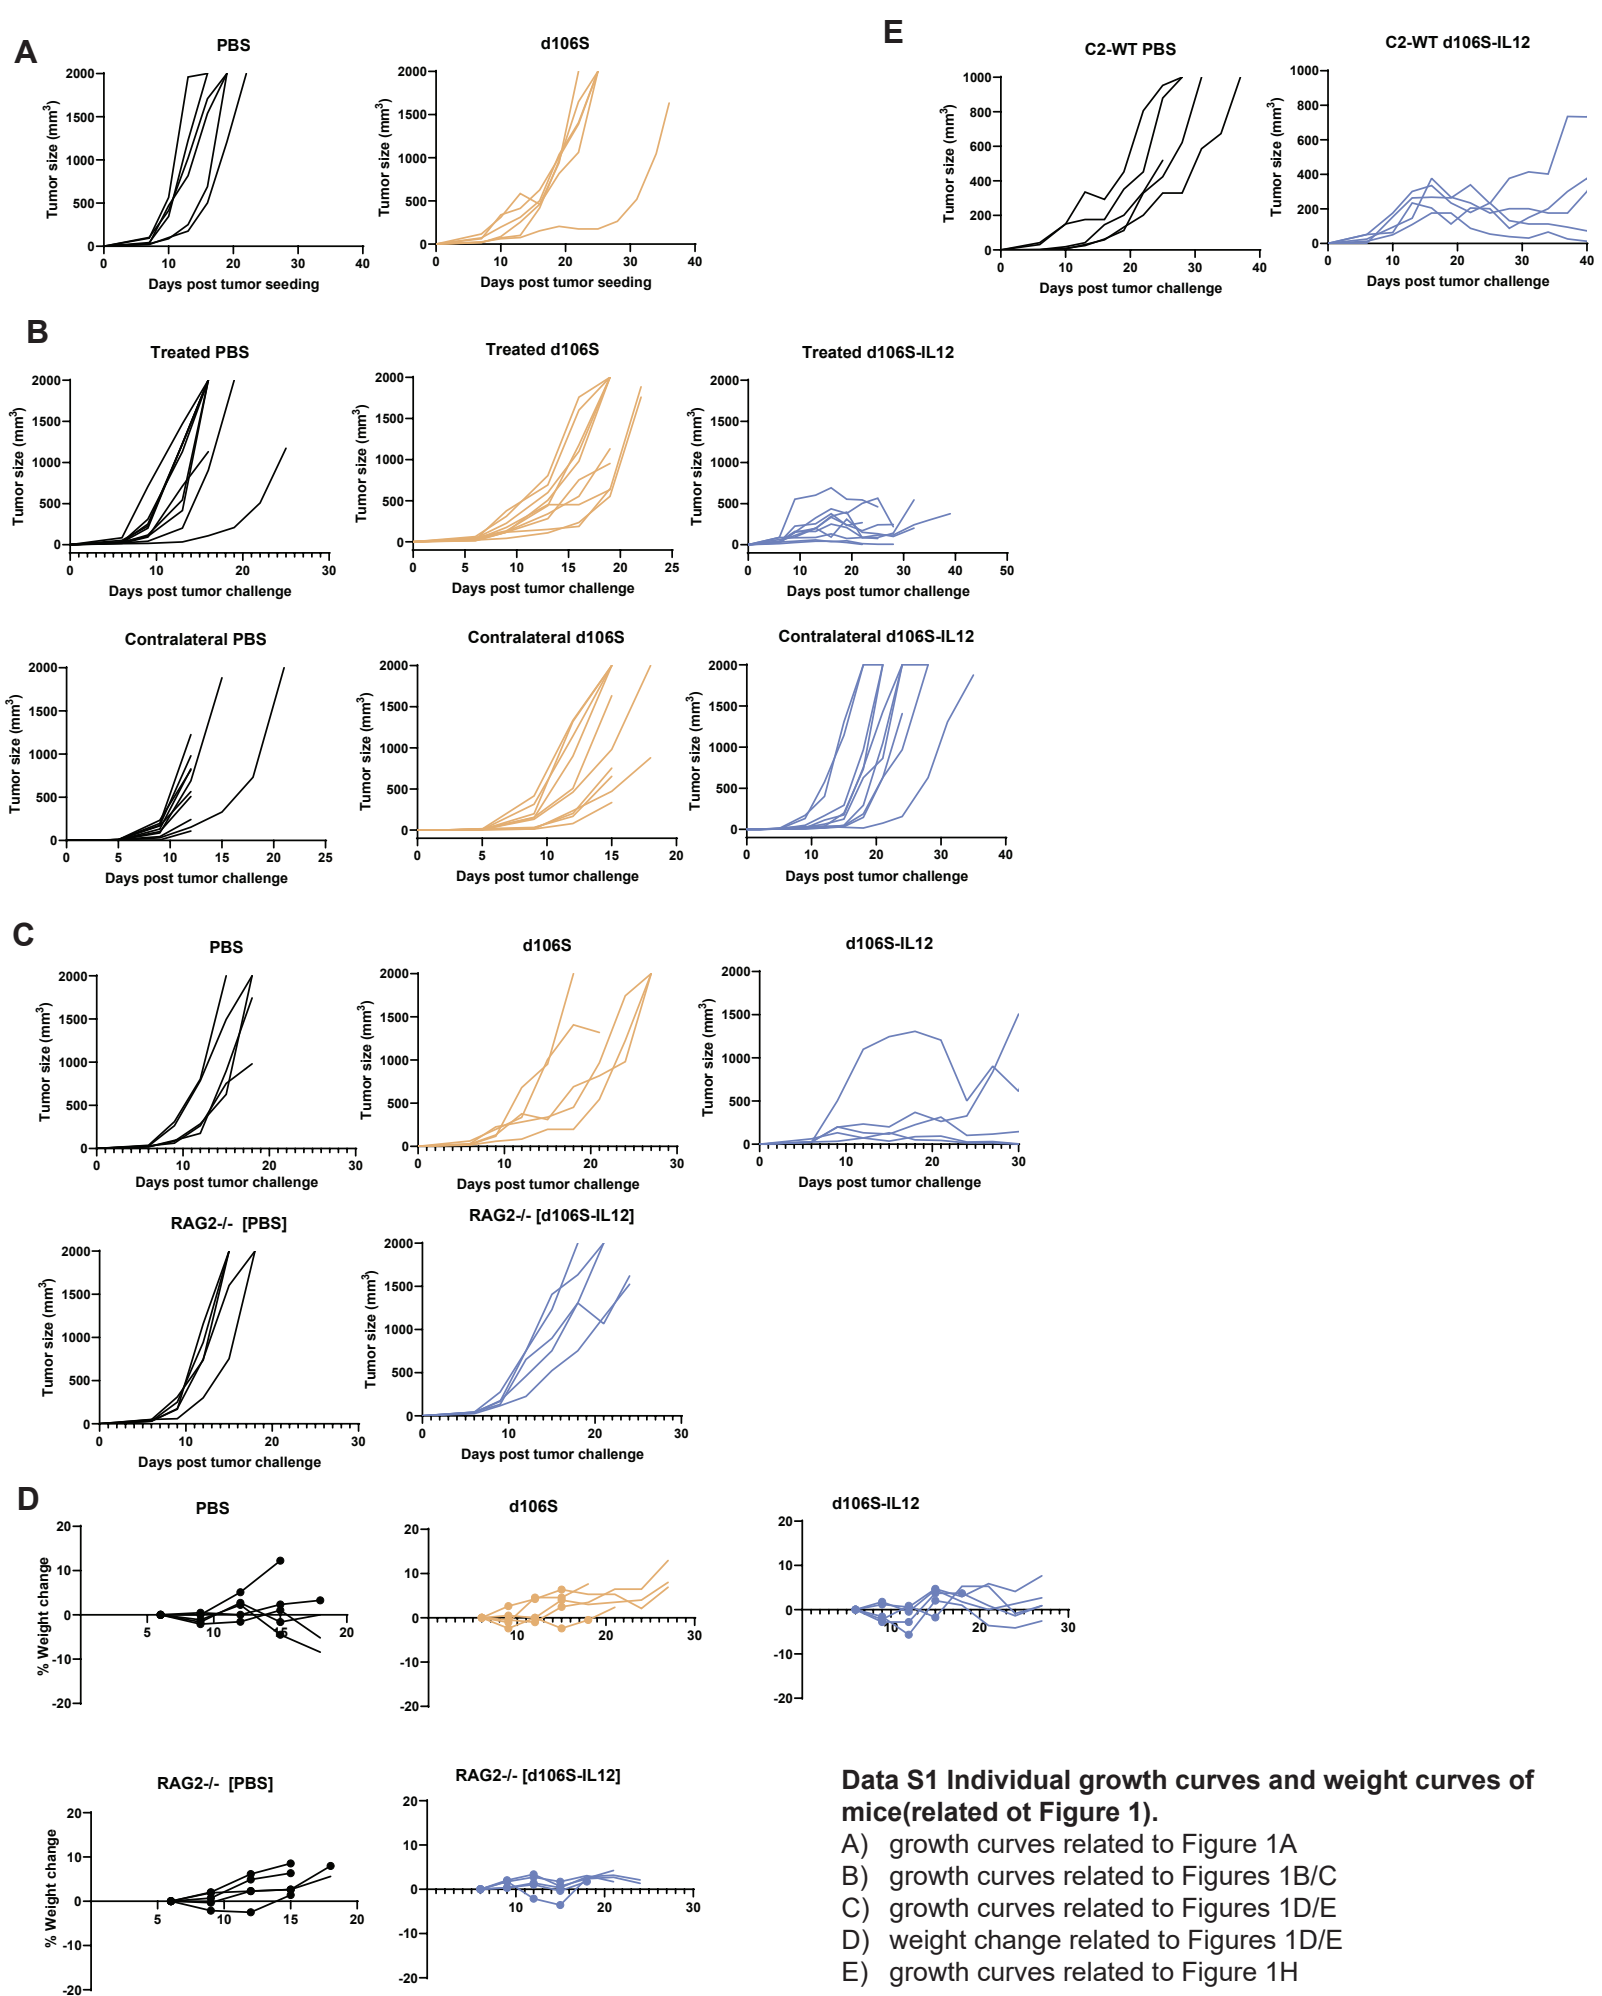

**A**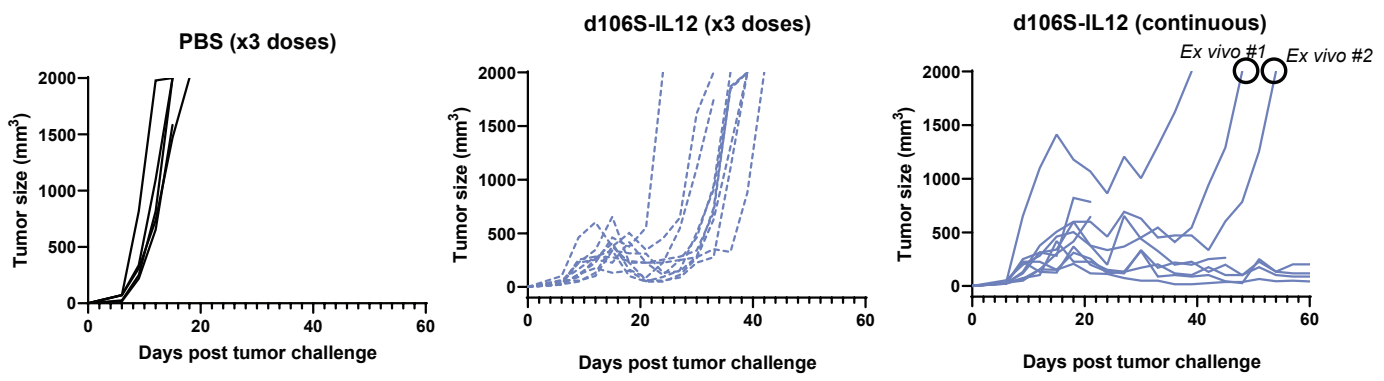**B**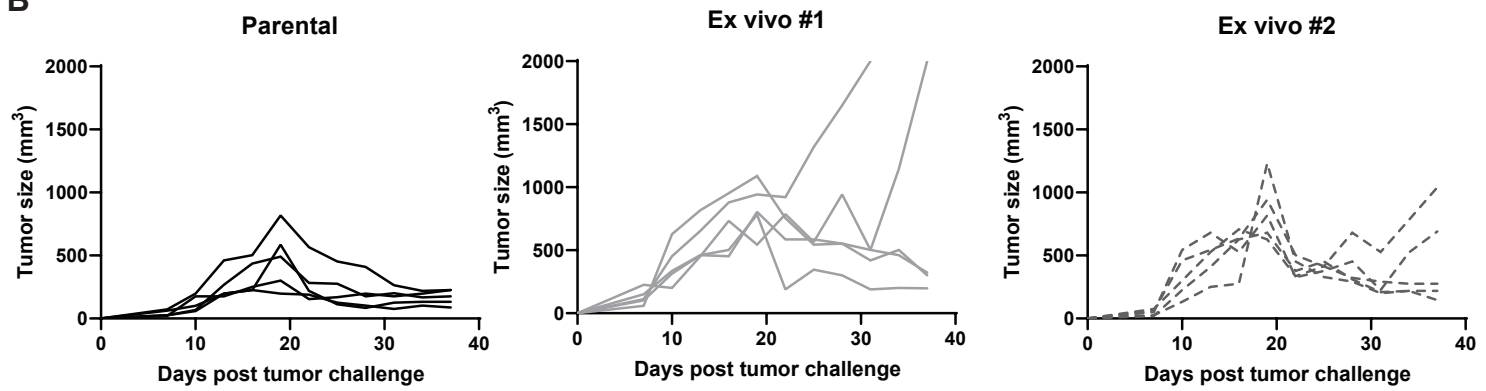

**Data S2 Individual growth curves of mice (related to Figure 2).**

A) growth curves related to Figure 2A

B) growth curves related to Figure 2D

**A**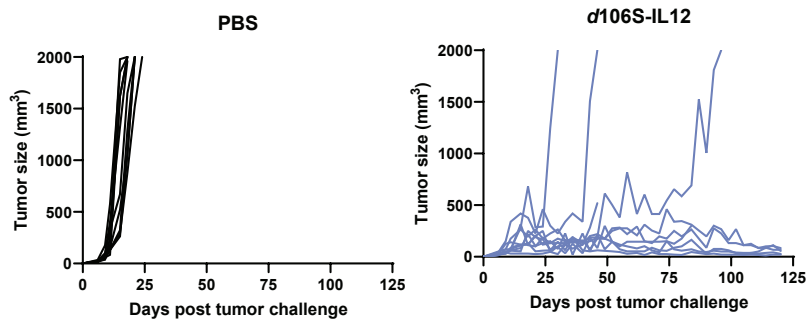**B**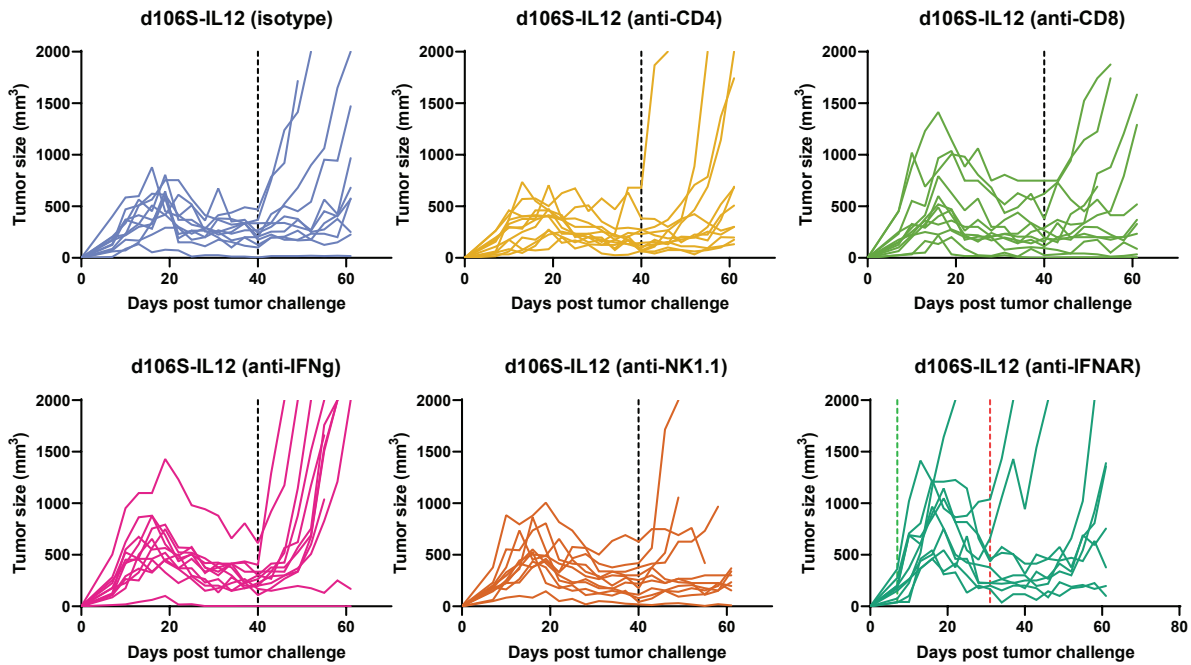**C**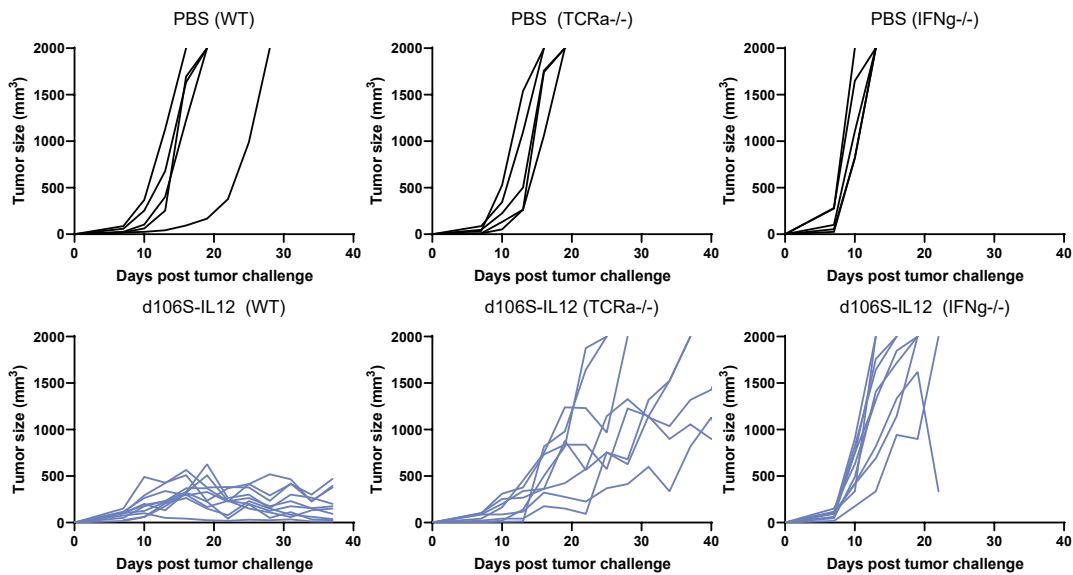**D**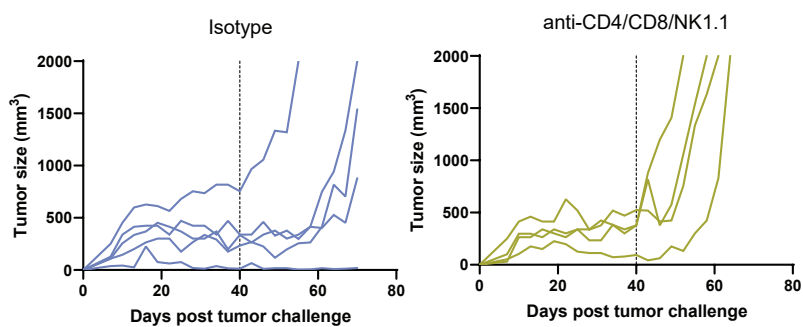

### Data S3 Individual growth curves of mice (related to Figure 4).

- A) growth curves related to Figures 4A/B
- B) growth curves related to Figure 4C
- C) growth curves related to Figure 4D
- D) growth curves related to Figure 4E

**A**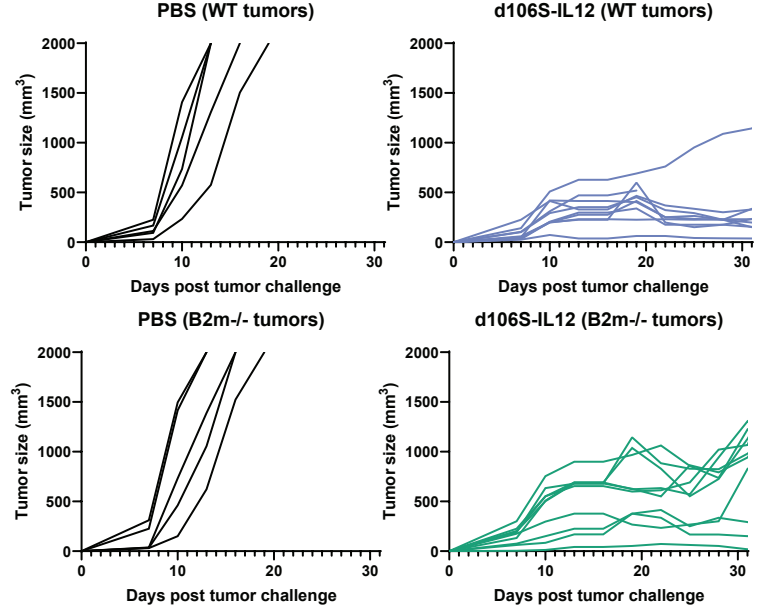**B**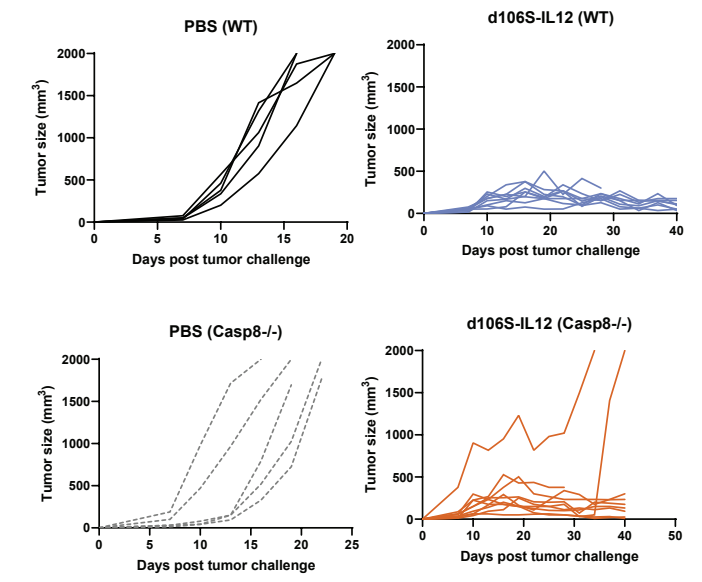**C**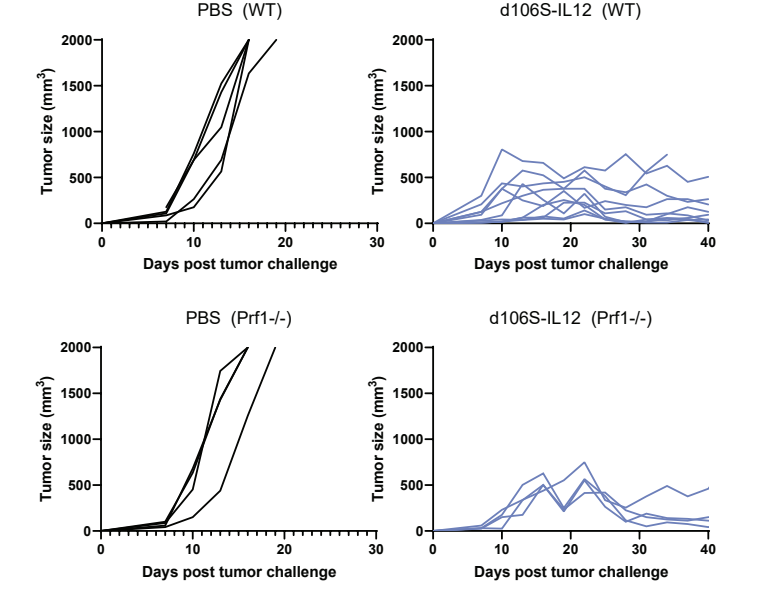**D**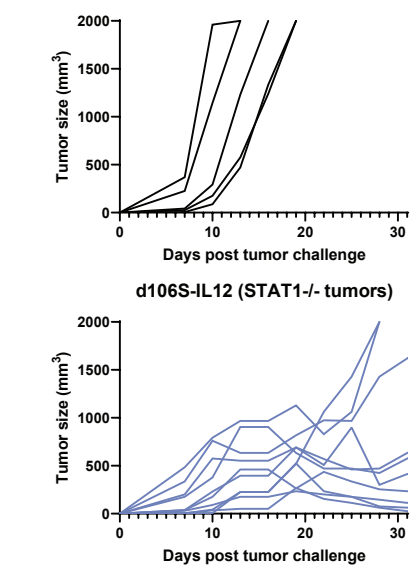**E**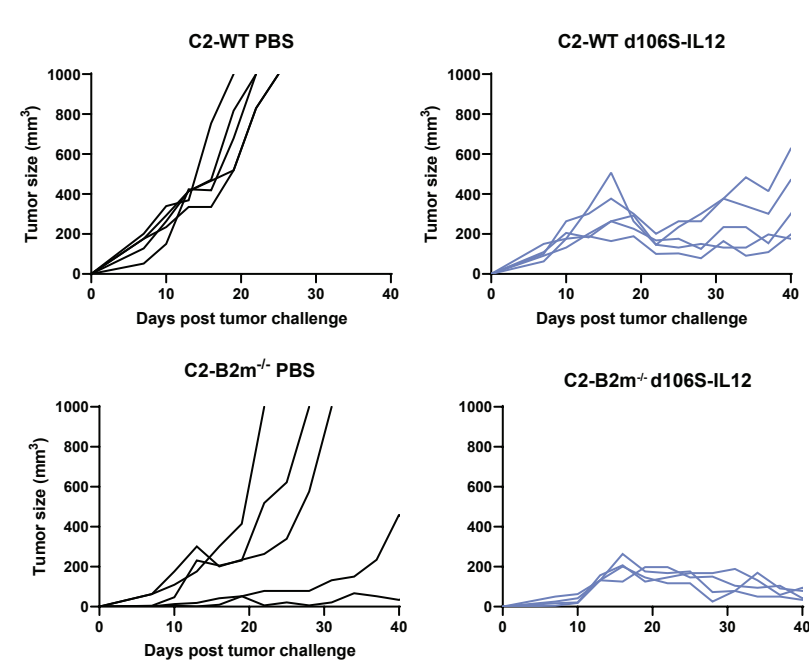

**Data S4 Individual growth curves of mice (related to Figures 5, S7).**

- A) growth curves related to Figures 5B
- B) growth curves related to Figure 5C
- C) growth curves related to Figure 5D
- D) growth curves related to Figure S7L
- E) growth curves related to Figure 5E

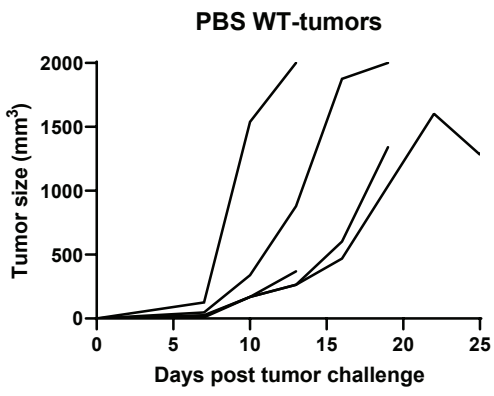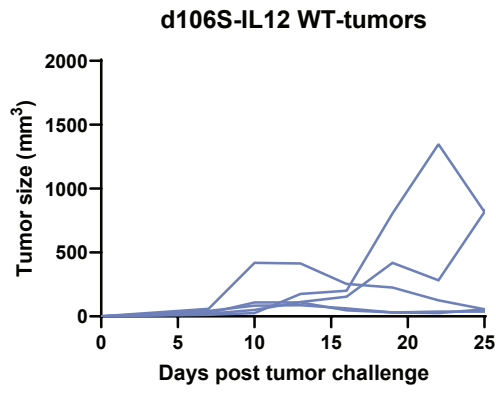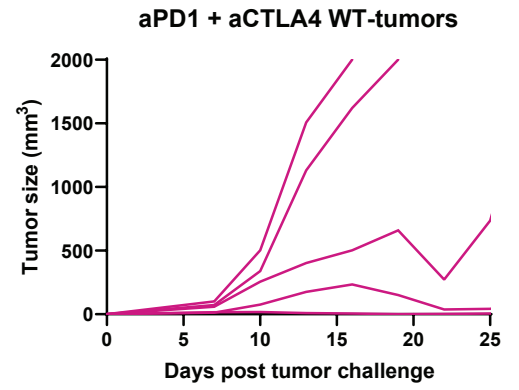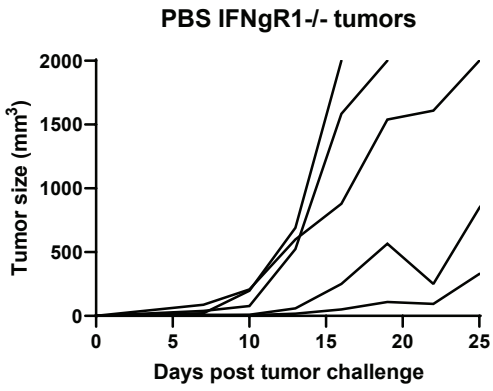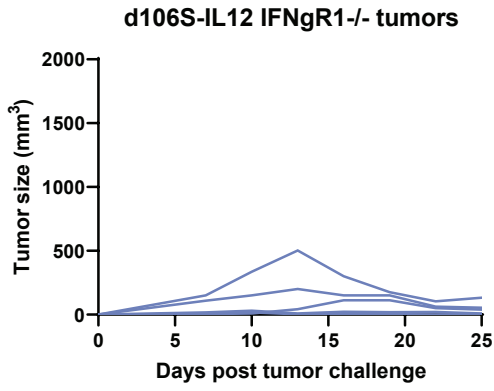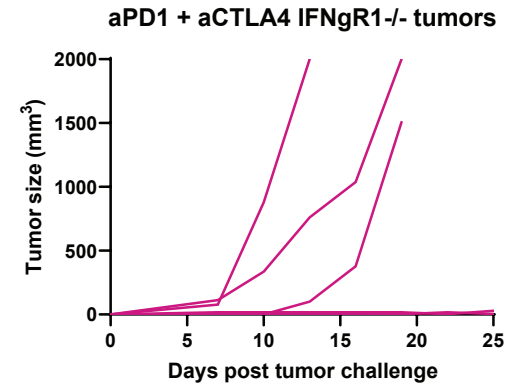

**Data S5 Individual growth curves of mice (related to Figure 6).**  
Growth curves related to Figure 6D

**A**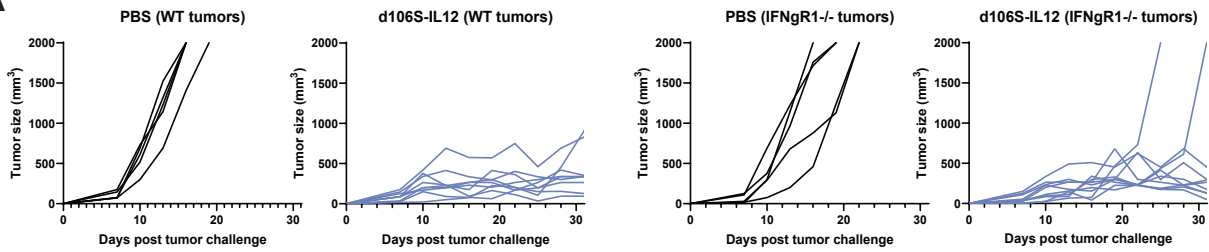**B**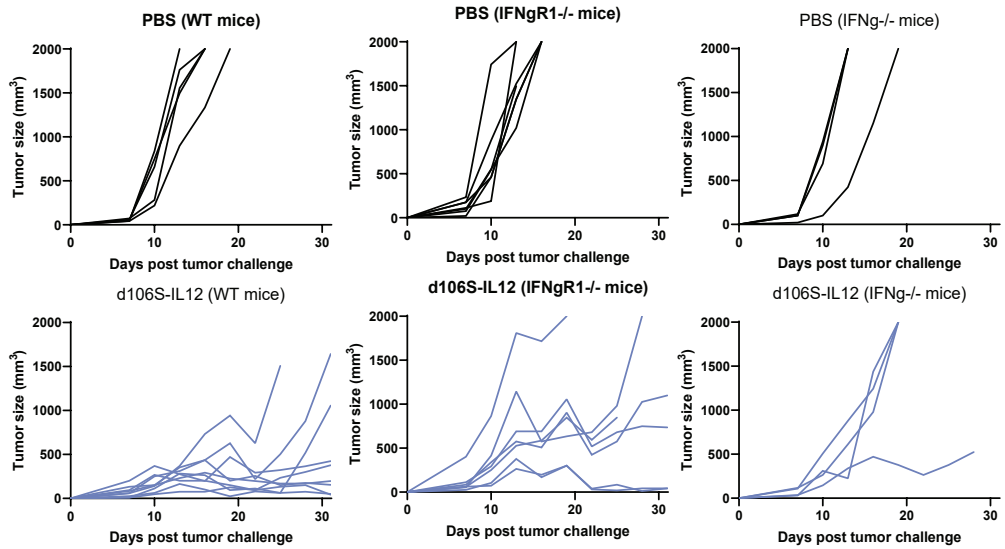**C**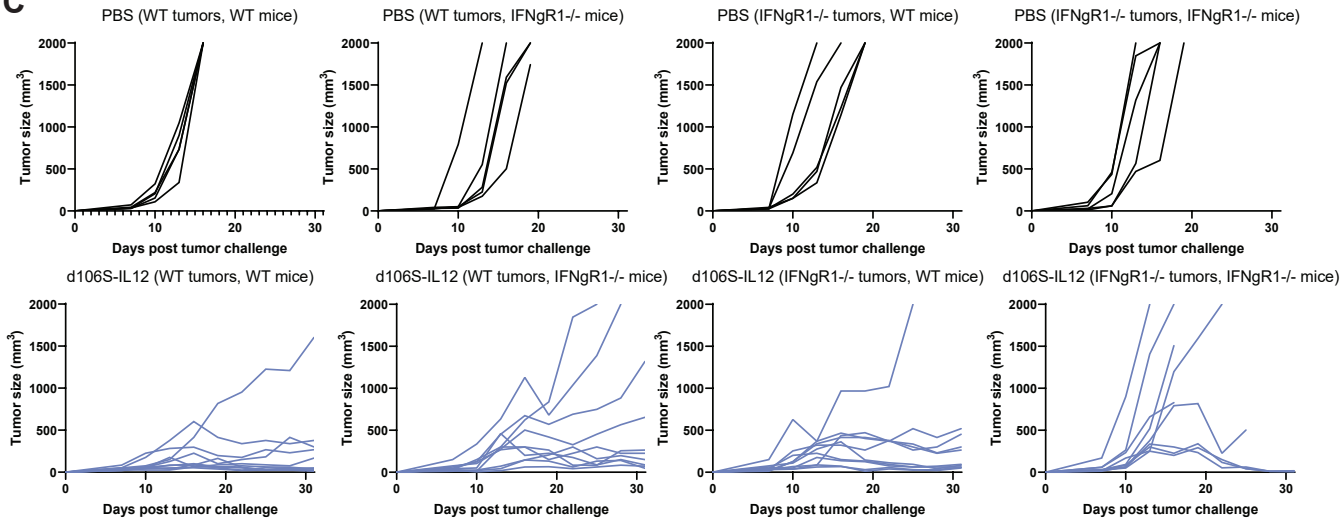**D**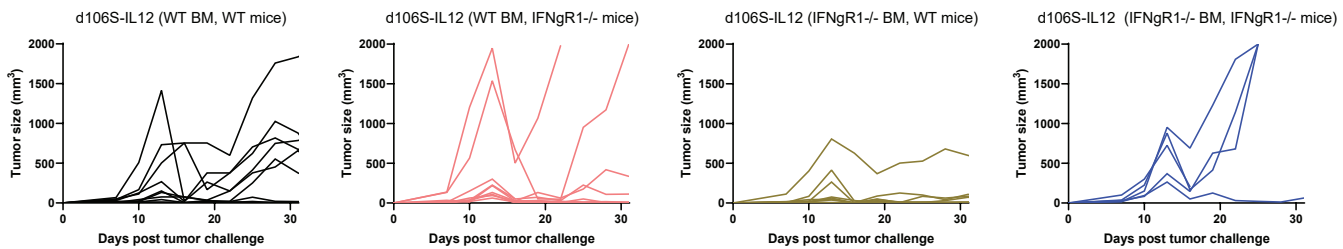

### Data S6 Individual growth curves of mice (related to Figure 7).

- A) growth curves related to Figures 7A
- B) growth curves related to Figure 7B
- C) growth curves related to Figure 7C
- D) growth curves related to Figure 7D
